# Supplementary material
Source: Elsevier journal article supplement (https://www.sciencedirect.com/science/article/pii/S0300289621001162)
Supplement: mmc1 [file S0300289621001162:mmc1.pdf]

## Supplementary Data

**Table 1.** Definition of HRCT findings especially detailed for: 1) those cases with mild radiological abnormalities, 2) honeycombing quantification.

|                                     |                                                                                                                                       |
|-------------------------------------|---------------------------------------------------------------------------------------------------------------------------------------|
| Honeycombing                        | Cystic air spaces<br>Several milli- meters to 1 cm diameter<br>with thick clearly defined walls<br>located mainly in subpleural areas |
| Ground-glass                        | Increased lung attenuation (as mist) that<br>allows to view the underlying vessels<br>through it.                                     |
| Reticular thickening                | Irregular intralobular crisscrossed lines<br>Randomly arranged and separated by a<br>few millimeters.                                 |
| Distortion of the lung architecture | Abnormal displacement of bronchi,<br>interlobar fissures and interlobular<br>septa.                                                   |
